# Supplementary material for: Anticancer Activity of Two Novel Hydroxylated Biphenyl Compounds toward Malignant Melanoma Cells
Source: Int J Mol Sci. 2021 May 26;22(11):5636. doi: 10.3390/ijms22115636 (PMC8198844; doi:10.3390/ijms22115636)
Supplement: Supplementary file 1 [file ijms-22-05636-s001.zip]

Archive with 5 entries (5 files):
- Captions to Supplementary Figures.pdf
- Figure S1.tiff
- Figure S2.tiff
- Figure S3.tiff
- Figure S4.tiff
